# Supplementary material for: Surface morphology evolution of cobalt nanoparticles induced by hydrogen adsorption: a theoretical study
Source: Royal Society of Chemistry journal article supplement (doi:10.1039/d2nj00356b), 2022-01-01
Supplement: d2nj00356b1.pdf [file d2nj00356b1.pdf]

# Surface Morphology Evolution of Cobalt Nanoparticle Induced by Hydrogen Adsorption: A Theoretical Study

Xiaobin Geng<sup>a,c</sup>, Jinjia Liu<sup>b,c,\*</sup>, Hui Yang<sup>b,c,d</sup>, Wenping Guo<sup>c</sup>, Jie Bai<sup>a,\*</sup>  
and Xiaodong Wen<sup>b,c,\*</sup>

<sup>a</sup> Inner Mongolia University of technology, Huhhot 010000, China

<sup>b</sup> State Key Laboratory of Coal Conversion, Institute of Coal Chemistry, Chinese Academy of Sciences, Taiyuan, 030001, China

<sup>c</sup> National Energy Center for Coal to Liquids, Synfuels China Co., Ltd, Huairou District, Beijing, 101400, China

<sup>d</sup> University of Chinese Academy of Sciences, No. 19A Yuquan Road, Beijing, 100049, China

## Corresponding Author:

Jinjia Liu (Email: [liujj6636@163.com](mailto:liujj6636@163.com))

Jie Bai (Email: [baijie@imut.edu.cn](mailto:baijie@imut.edu.cn))

Xiao-Dong Wen (Email: [wxd@sxicc.ac.cn](mailto:wxd@sxicc.ac.cn))

**Table S1.** Calculated most stable H adsorption energy ( $E_{\text{ads}}$ , in eV), the most stable site of H adsorption on HCP-Co, the distance ( $d_{\text{Co-H}}$ , in Å) between the H atom and the cobalt surface.

**Table S2.** Surface energies ( $\gamma$ , in eV/Å<sup>2</sup>) and surface area proportion Ss (%) of facets exposed on HCP-Co surfaces under H atmosphere at T = 300 K.

**Table S3.** Surface energies ( $\gamma$ , in eV/Å<sup>2</sup>) and surface area proportion Ss (%) of facets exposed on HCP-Co surfaces under H atmosphere at T = 500 K.

**Table S4.** Surface energies ( $\gamma$ , in eV/Å<sup>2</sup>) and surface area proportion Ss (%) of facets exposed on HCP-Co surfaces under H atmosphere at T = 700 K.

**Figure S1.** The structure of H adsorbed on Co(0001) before and after the optimization calculation.

**Figure S2-7.** Structures and stepwise adsorption energies  $\Delta E$  (eV) of H atoms on six Co surfaces.

**Figure S8.** Change of Gibbs free energy of the Co (0001) (10-10) (10-11) (10-12) (11-20) (11-21) with nH atoms as a function of H<sub>2</sub> chemical potential

**Table S1.** Calculated most stable H adsorption energy ( $E_{\text{ads}}$ , in eV), the most stable site of adsorption H on HCP-Co, the distance ( $d_{\text{Co-H}}$ , in Å) between the H atom and the cobalt surface.

| (hkil) | $d_{\text{Co-H}}$ (Å) | site | $E_{\text{ads}}$ (eV) |
|--------|-----------------------|------|-----------------------|
| 0001   | 0.964                 | f    | -0.47                 |
| 10-10  | 0.867                 | 3f2  | -0.56                 |
| 10-11  | 0.897                 | 3f2  | -0.54                 |
| 10-12  | 0.655                 | 3f2  | -0.53                 |
| 11-20  | 1.110                 | bg1  | -0.35                 |
| 11-21  | 0.936                 | 3f1  | -0.50                 |

**Table S2.** Surface energies ( $\gamma$ , in eV/Å<sup>2</sup>) and surface area proportion Ss (%) of facets exposed on HCP-Co surfaces under H atmosphere at T = 300 K.

|            | 1 atm                         |        | 10 atm                        |        | 20 atm                        |        | 30 atm                        |        |
|------------|-------------------------------|--------|-------------------------------|--------|-------------------------------|--------|-------------------------------|--------|
|            | $\gamma$ (eV/Å <sup>2</sup> ) | Ss (%) |
| Co (0001)  | 0.101                         | 15     | 0.097                         | 15     | 0.095                         | 15     | 0.094                         | 15     |
| Co (10-10) | 0.102                         | 16     | 0.096                         | 17     | 0.094                         | 17     | 0.093                         | 17     |
| Co (10-11) | 0.098                         | 69     | 0.093                         | 68     | 0.091                         | 68     | 0.090                         | 68     |
| Co (10-12) | 0.115                         | 0      | 0.110                         | 0      | 0.108                         | 0      | 0.108                         | 0      |
| Co (11-20) | 0.149                         | 0      | 0.144                         | 0      | 0.141                         | 0      | 0.140                         | 0      |
| Co (11-21) | 0.138                         | 0      | 0.133                         | 0      | 0.132                         | 0      | 0.131                         | 0      |

**Table S3.** Surface energies ( $\gamma$ , in eV/Å<sup>2</sup>) and surface area proportion Ss (%) of facets exposed on HCP-Co surfaces under H atmosphere at T = 500 K.

|            | 1 atm                         |        | 10 atm                        |        | 20 atm                        |        | 30 atm                        |        |
|------------|-------------------------------|--------|-------------------------------|--------|-------------------------------|--------|-------------------------------|--------|
|            | $\gamma$ (eV/Å <sup>2</sup> ) | Ss (%) |
| Co (0001)  | 0.121                         | 14     | 0.114                         | 15     | 0.112                         | 15     | 0.111                         | 15     |
| Co (10-10) | 0.130                         | 14     | 0.121                         | 11     | 0.118                         | 12     | 0.117                         | 12     |
| Co (10-11) | 0.123                         | 65     | 0.114                         | 70     | 0.112                         | 70     | 0.110                         | 71     |
| Co (10-12) | 0.135                         | 7      | 0.128                         | 4      | 0.126                         | 3      | 0.125                         | 2      |
| Co (11-20) | 0.157                         | 0      | 0.157                         | 0      | 0.157                         | 0      | 0.157                         | 0      |
| Co (11-21) | 0.154                         | 0      | 0.149                         | 0      | 0.147                         | 0      | 0.147                         | 0      |

**Table S4.** Surface energies ( $\gamma$ , in eV/Å<sup>2</sup>) and surface area proportion Ss (%) of facets exposed on HCP-Co surfaces under H atmosphere at T = 700 K.

|            | 1 atm                         |        | 10 atm                        |        | 20 atm                        |        | 30 atm                        |        |
|------------|-------------------------------|--------|-------------------------------|--------|-------------------------------|--------|-------------------------------|--------|
|            | $\gamma$ (eV/Å <sup>2</sup> ) | Ss (%) |
| Co (0001)  | 0.132                         | 17     | 0.130                         | 14     | 0.128                         | 14     | 0.127                         | 14     |
| Co (10-10) | 0.141                         | 26     | 0.139                         | 20     | 0.137                         | 20     | 0.136                         | 18     |
| Co (10-11) | 0.147                         | 42     | 0.138                         | 51     | 0.135                         | 53     | 0.132                         | 58     |
| Co (10-12) | 0.156                         | 11     | 0.147                         | 13     | 0.144                         | 13     | 0.143                         | 10     |
| Co (11-20) | 0.157                         | 4      | 0.157                         | 2      | 0.157                         | 0      | 0.157                         | 0      |
| Co (11-21) | 0.165                         | 0      | 0.161                         | 0      | 0.160                         | 0      | 0.159                         | 0      |

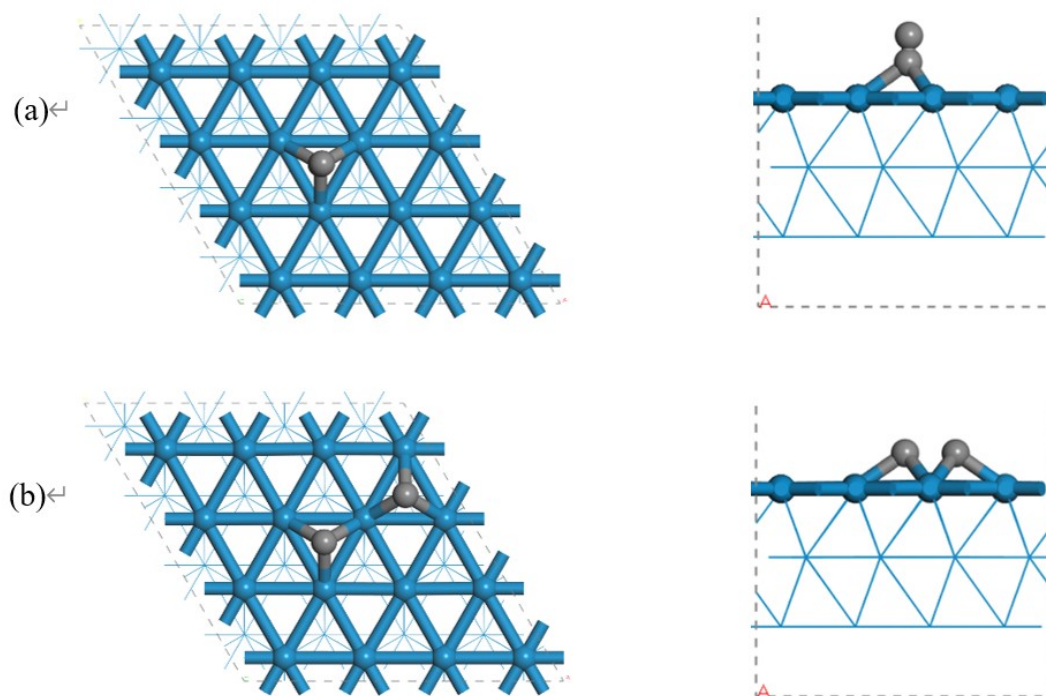

**Figure S1.** The structure of H adsorbed on Co (0001) before (a) and after (b) the optimization calculation. (Gray is hydrogen atom, blue is cobalt atom)

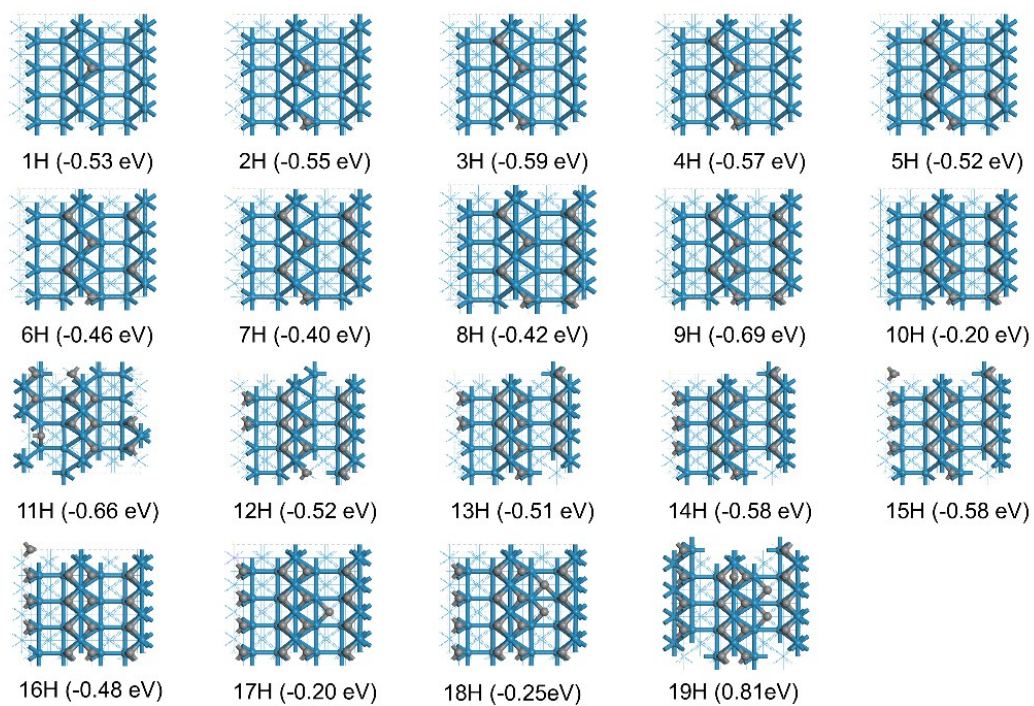

**Figure S2.** Structures and stepwise adsorption energies  $\Delta E_{\text{ads}}$  (eV) of  $n_{\text{H}}$  atoms on Co (10-12). (Gray is hydrogen atom, blue is cobalt atom)

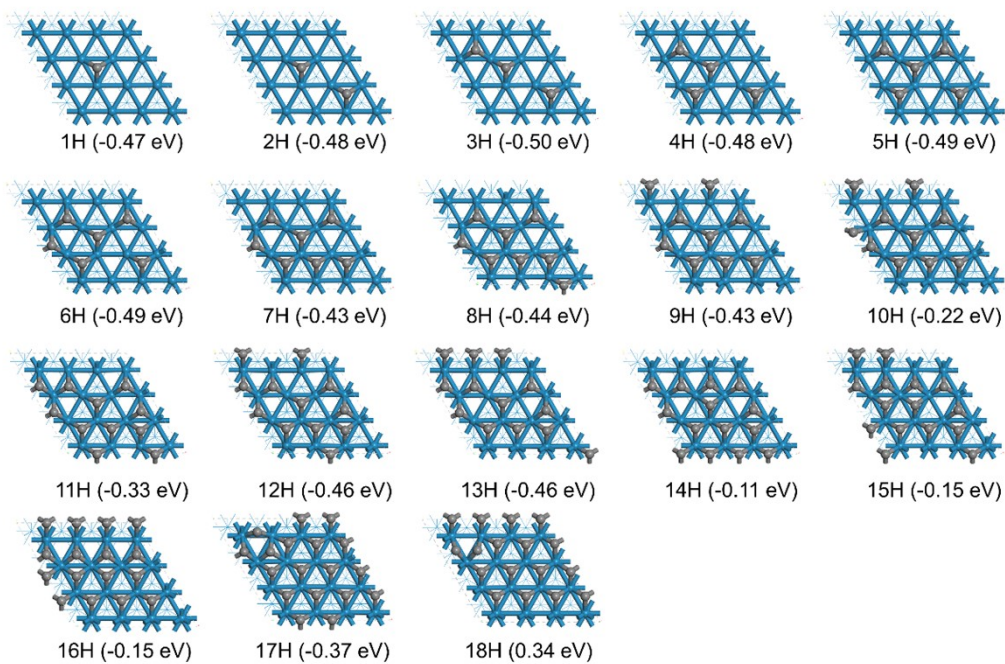

**Figure S3.** Structures and stepwise adsorption energies  $\Delta E_{\text{ads}}$  (eV) of  $n_{\text{H}}$  atoms on Co (0001). (Gray is hydrogen atom, blue is cobalt atom)

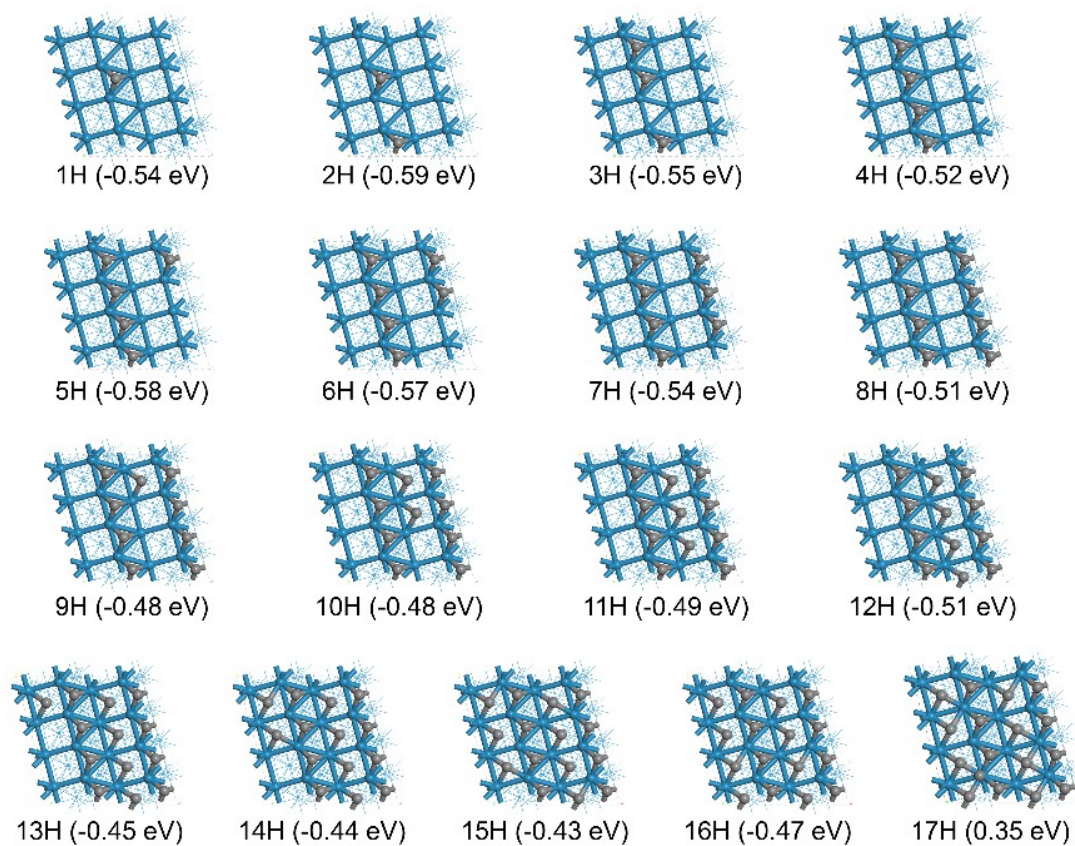

**Figure S4.** Structures and stepwise adsorption energies  $\Delta E_{\text{ads}}$  (eV) of  $n_{\text{H}}$  atoms on Co (10-11). (Gray is hydrogen atom, blue is cobalt atom)

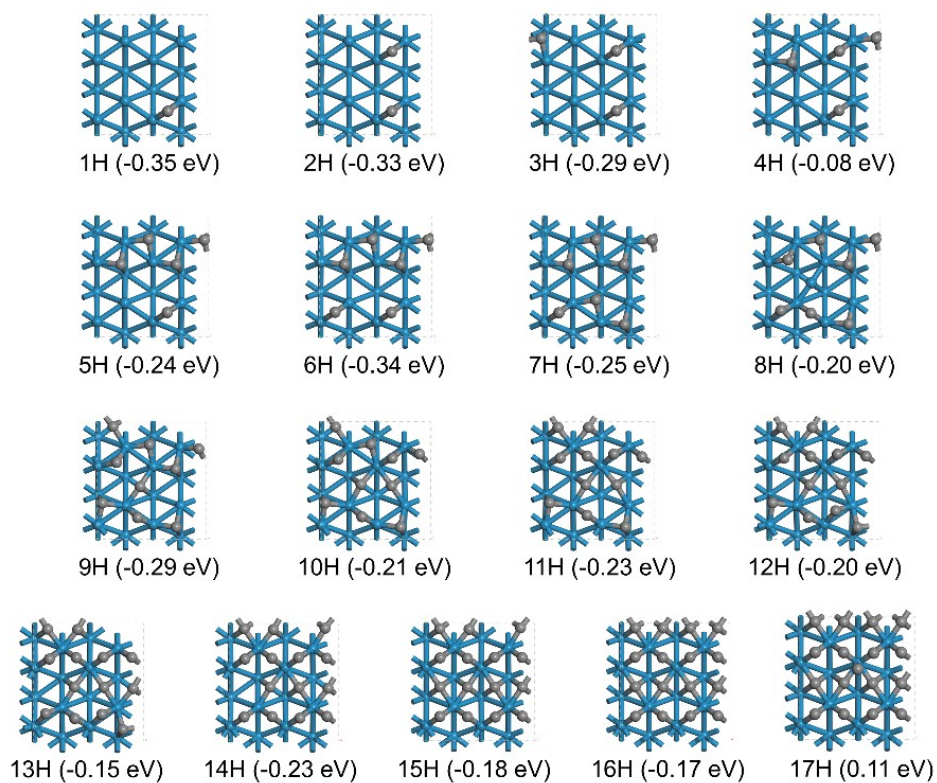

**Figure S5.** Structures and stepwise adsorption energies  $\Delta E_{\text{ads}}$  (eV) of  $n_{\text{H}}$  atoms on Co (11-20). (Gray is hydrogen atom, blue is cobalt atom)

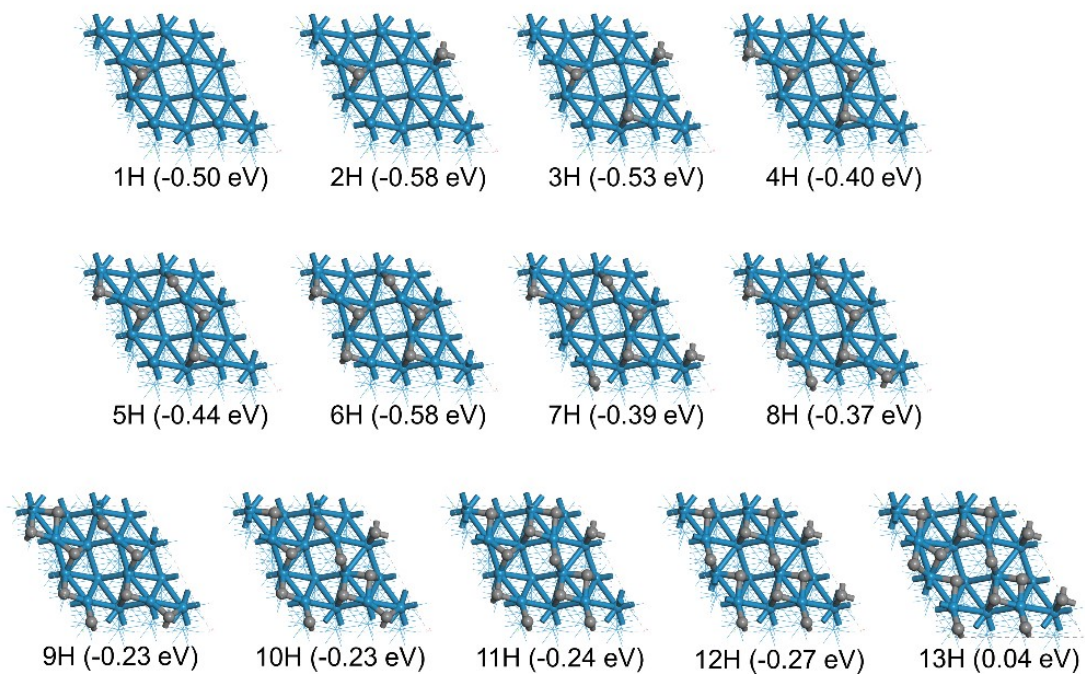

**Figure S6.** Structures and stepwise adsorption energies  $\Delta E_{\text{ads}}$  (eV) of  $n_{\text{H}}$  atoms on Co (11-21). (Gray is hydrogen atom, blue is cobalt atom)

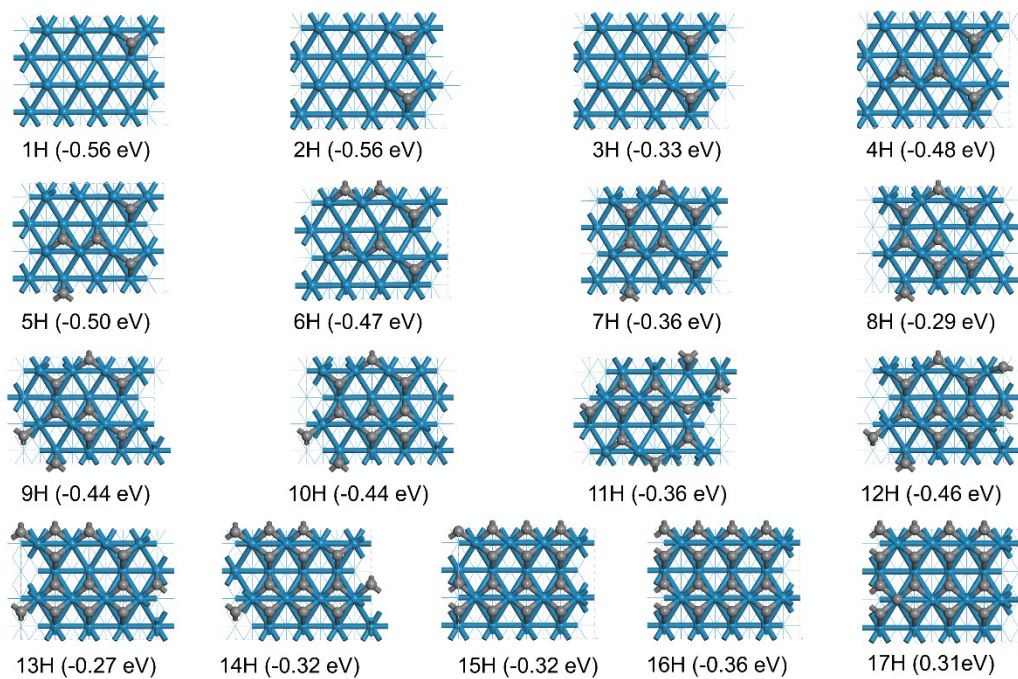

**Figure S7.** Structures and stepwise adsorption energies  $\Delta E_{\text{ads}}$  (eV) of  $n_{\text{H}}$  atoms on Co (10-10). (Gray is hydrogen atom, blue is cobalt atom)



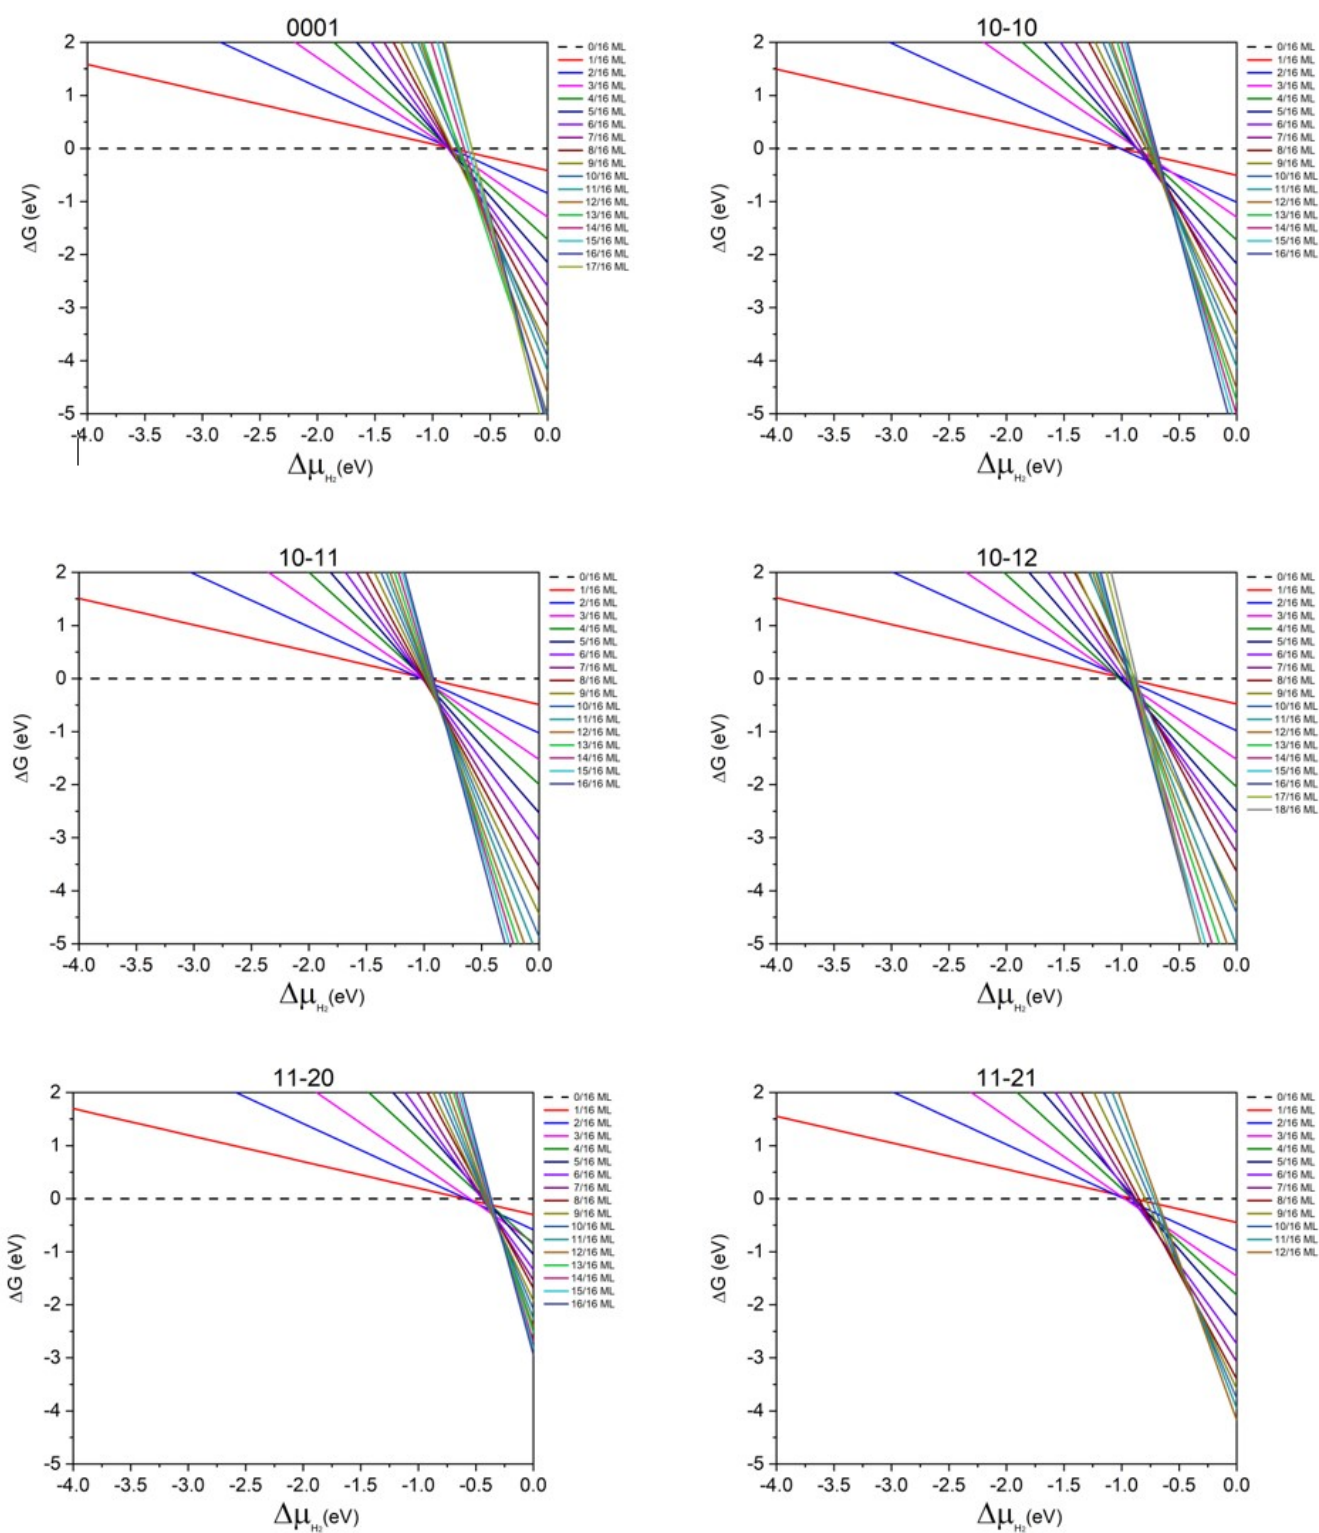

**Figure S8.** Change of Gibbs free energy of the Co (0001) (10-10) (10-11) (10-12) (11-20) (11-21) with  $n_{\text{H}}$  atoms as a function of  $\text{H}_2$  chemical potential
